# Supplementary material for: Survivor Voices and Institutional Barriers: Assessing One-Stop Crisis Centers in Bangladesh through the Gender-Responsive Public Services Framework
Source: Research Square preprint supplement (doi:10.21203/rs.3.rs-7570606/v1), 2025-10-24
Supplement: Supplementary file 2 [file 84dbe010f9868c32dd5c25b8.docx]

| Theme | Subtheme | Representative Quotes |
| --- | --- | --- |
| 1. Unequal Awareness and Access | Limited awareness of OCCs | “I had never heard of such a place before that day. No one in my village knew it existed. If the police officer hadn’t insisted, I would have gone back home, thinking there was no help for someone like me. People talk about hospitals and courts, but never about this center.” (Survivor, 9)  “There are no posters, no community announcements, nothing on the radio. For women in rural areas, this center might as well not exist. It feels like a hidden service, only for those who are lucky enough to stumble upon it.” (Survivor, 23) |
| Gatekeeping by police and hospitals | “I didn’t choose to come here; the hospital doctor said I had to. If I had come by myself, they might not even have let me in. It feels like survivors need permission from police or doctors to enter, and that makes us dependent on others instead of being able to seek help directly.” (Survivor, 22)  “Unless the police bring them, many survivors don’t even reach us. The system unintentionally makes the police a gatekeeper. This discourages women who are already afraid of law enforcement.” (*OCC staff, Dhaka*) |
| Rural–urban disparities | “It took me more than three hours to travel here, changing buses and walking long stretches. By the time I arrived, I was exhausted and frightened. Many women from my area wouldn’t even attempt the journey.” (Survivor, 7) |
| 2. Institutional Gaps and Resource Constraints | Staffing shortages | “When I came, the counselor was not available. They told me to wait until the next day. I felt like my pain had to be put on hold. In that moment, I thought: if there is no one to listen now, then what is the meaning of a crisis center?” (Survivor, 5)  “We don’t have enough staff to cover all shifts. If one person is absent, everything slows down. Survivors may have to wait hours just to give their statement or get medical care.” (*OCC staff, Cox’s Bazar*) |
| Inadequate trauma training | “Some staff are kind, but others don’t know how to talk to survivors. Instead of comforting me, they kept repeating the same questions, like they didn’t understand that answering them was painful. It felt like I was being interrogated, not helped.” (Survivor, 2)  “We never received proper training on trauma-sensitive care. Many staff treat cases like routine paperwork rather than recognizing the psychological toll on survivors.” (Counselor, OCC) |
| 3. Survivor Experiences and Service Sensitivity | Judgmental staff & stigmatization | “The nurse asked me why I was out at night and whether I trusted the wrong people. Her words felt like knives. I wanted to scream, ‘It wasn’t my fault!’ but I stayed quiet because I needed treatment. I felt small and ashamed.” (Survivor, 21)  “Instead of asking how I was coping, they wanted to know what I wore, what time I left home, and who I spoke to. I felt blamed for the violence I suffered.” (Survivor, 2) |
| Privacy concerns | “They interviewed me in a room where other patients were present. I could feel their eyes on me, and I wanted to disappear. Speaking about such a painful thing in public made me feel exposed and humiliated.” (Survivor, 24)  “Confidentiality is almost impossible here. The space is small, people are always coming in and out, and survivors can’t trust that their stories will stay private.” (*OCC staff, Dhaka* ) |
| 4. Coordination and Continuity of Care | Weak referral & follow-up | “After my first treatment, nobody contacted me. They said I could get legal help, but I never heard from anyone again. I had to find my own way, which was confusing and scary. It felt like the support ended as soon as I walked out of the room.” (Survivor, 20)  “There is no system to make sure survivors actually reach the lawyer or counselor. We write down their names and numbers, but after that, it depends on whether they come back. Many cases are lost this way.” (*OCC staff, Dhaka*)  “Sometimes we send referrals, but the survivor never shows up at the next office. Without a case-tracking system, we cannot be sure if she ever got the services promised.” (*OCC staff, Cox’s Bazar* ) |
| 5. Policy Commitment vs. Implementation Gap | Lack of accountability & feedback | “The government talks about protecting women, but when you come here, you see how little has changed. Promises are made on paper, but in reality, the rooms are crowded, staff are missing, and survivors are not even asked how the service worked for them.” (Survivor, 21)  “Policies are strong, but the local implementation is weak. We don’t have mechanisms to evaluate the quality of services or hear survivors’ feedback. Without monitoring, centers risk becoming symbolic rather than transformative.” (*OCC staff, Cox’s Bazar*)  “No one asked me how I felt about the service. I wanted to say that the room was too crowded, and I didn’t feel safe staying overnight. But there was no form, no number, nothing.” (Survivor, 18) |

Conceptual Mapping of Findings to the Gender-Responsive Public Services (GRPS) Framework

| Theme | Subtheme | GRPS Principle |
| --- | --- | --- |
| 1. Unequal Awareness and Access | Limited awareness of OCCs | Accessibility |
| Gatekeeping by police and hospitals |
| Rural–urban disparities |
| 2. Institutional Gaps and Resource Constraints | Staffing shortages | Quality of Care |
| Inadequate trauma training |
| 3. Survivor Experiences and Service Sensitivity | Judgmental staff & stigmatization | Integration & Continuity (part of Quality/Accessibility in GRPS) |
| Privacy concerns |
| 4. Coordination and Continuity of Care | Weak referral & follow-up | Accountability |
| 5. Policy Commitment vs. Implementation Gap | Lack of accountability & feedback | Participation |
